# Supplementary material
Source: MDPI journal article supplement (https://www.mdpi.com/1424-8247/14/10/978)
Supplement: s1 [file s1]

**Table S1.** Data resulted from docking of the putative bioactive compounds in alpha-glucosidase (3A4A).

| Compound      | Interacting amino acid residues | Bond type      | Bond distance (Å) |
|---------------|---------------------------------|----------------|-------------------|
| ADG           | ASP352                          | Hydrogen bond  | 2.44              |
|               | GLH277                          | Hydrogen bond  | 2.74              |
|               | ASH215                          | Hydrogen bond  | 2.43, 2.74        |
|               | HIE112                          | Hydrogen bond  | 2.18              |
|               | ASH69                           | Hydrogen bond  | 1.75, 2.12        |
|               | ARG442                          | Hydrogen bond  | 1.87              |
|               | HIE351                          | Hydrogen bond  | 1.96              |
| Quercetin     | ASH215                          | Hydrogen bond  | 2.49              |
|               | GLH277                          | Hydrogen bond  | 2.01              |
|               | PHE303                          | Pi-Pi T-shaped | 4.97, 5.14        |
|               | ARG442                          | Pi-cation      | 3.77              |
|               | ASP352                          | Pi-anion       | 4.30              |
| Compound<br>1 | ASP352                          | Hydrogen bond  | 2.35              |
|               | HIE351                          | Hydrogen bond  | 2.40              |
|               | GLN182                          | Hydrogen bond  | 2.70              |
|               | AGR442                          | Pi-cation      | 4.18              |
|               | VAL216                          | Pi-alkyl       | 5.47              |
| Compound<br>2 | HIE351                          | Hydrogen bond  | 2.20              |
|               | ASH215                          | Hydrogen bond  | 2.30              |
|               | ARG442                          | Hydrogen bond  | 2.89              |
|               | PHE303                          | Pi-alkyl       | 4.66; 5.21        |
|               | TYR158                          | Pi-alkyl       | 4.91              |
| Compound<br>3 | SER 311                         | Hydrogen bond  | 2.20              |
|               | TYR 72                          | Pi-sigma       | 3.88              |
|               |                                 | Pi-alkyl       | 4.61              |
|               | PHE 178                         | Pi-sigma       | 3.67              |
|               |                                 | Pi-alkyl       | 4.68              |
|               | TYR 158                         | Pi-alkyl       | 5.26              |
|               | HIE 280                         | Pi-alkyl       | 5.25              |
|               | PHE 303                         | Pi-alkyl       | 4.66              |
|               | ARG 315                         | Alkyl          | 4.12; 4.69        |

**Table S1.** Data resulted from docking of the putative bioactive compounds in alpha-glucosidase (3A4A) (cont).

| Compound      | Interacting amino acid residues | Bond type     | Bond distance (Å) |
|---------------|---------------------------------|---------------|-------------------|
| Compound<br>4 | ARG 213                         | Hydrogen bond | 2.89              |
|               | GLH 277                         | Hydrogen bond | 2.90              |
|               | ASP 352                         | Hydrogen bond | 2.87              |
|               | GLN 279                         | Hydrogen bond | 2.92              |
|               | ARG 315                         | Alkyl         | 4.54              |
|               | PHE 303                         | Pi-alkyl      | 5.18              |
|               | HIE 280                         | Pi-alkyl      | 5.17              |
|               | TYR 158                         | Pi-alkyl      | 4.79; 5.21        |
| Compound<br>5 | PHE 303                         | Pi-sigma      | 3.98              |
|               |                                 | Pi-alkyl      | 5.36; 5.00; 4.77  |
|               | PHE 159                         | Pi-alkyl      | 4.75              |
|               | TYR 158                         | Pi-alkyl      | 5.01              |
|               | TYR 72                          | Pi-sigma      | 3.97              |
|               | PHE 178                         | Pi-sigma      | 3.86              |
|               |                                 | Pi-alkyl      | 4.23; 5.35        |
|               | HIE280                          | Pi-alkyl      | 4.72              |
|               | ARG 315                         | Pi-alkyl      | 4.29              |
| Compound<br>6 |                                 | Alkyl         | 4.16              |
|               | PRO 312                         | Hydrogen bond | 2.92              |
|               | PHE 178                         | Pi-alkyl      | 4.56              |
|               | PHE 303                         | Pi-sigma      | 3.87              |
|               |                                 | Pi-alkyl      | 5.07; 4.98        |
|               | VAL 216                         | Alkyl         | 4.77              |
|               | HIE 351                         | Pi-alkyl      | 5.17              |
|               | TYR 72                          | Pi-sigma      | 3.78; 3.38        |
|               |                                 | Pi-alkyl      | 4.01              |
|               | HIE 280                         | Pi-alkyl      | 4.79; 4.38        |
|               | ARG 315                         | Pi-sigma      | 2.97              |
|               |                                 | Alkyl         | 4.15; 4.76        |
| Compound<br>7 | PHE 178                         | Pi-sigma      | 3.76              |
|               |                                 | Pi-alkyl      | 4.65              |
|               | TYR 72                          | Pi-alkyl      | 4.85              |
|               | PHE 303                         | Pi-alkyl      | 4.13              |
|               | ARG 315                         | Alkyl         | 4.68; 4.46        |
|               | TYR 158                         | Pi-alkyl      | 4.05; 5.08        |

**Table S1.** Data resulted from docking of the putative bioactive compounds in alpha-glucosidase (3A4A) (cont).

| <b>Compound</b>       | <b>Interacting amino acid residues</b> | <b>Bond type</b> | <b>Bond distance (Å)</b> |
|-----------------------|----------------------------------------|------------------|--------------------------|
| Compound<br><b>8</b>  | TYR 72                                 | Pi-sigma         | 3.80; 3.82               |
|                       | PHE 178                                | Pi-sigma         | 3.71                     |
|                       |                                        | Pi-alkyl         | 4.05                     |
|                       | PHE 303                                | Pi-alkyl         | 5.46; 4.62               |
|                       | TYR 158                                | Pi-alkyl         | 5.33; 4.35               |
|                       | ARG 315                                | Alkyl            | 5.03; 4.19; 4.46         |
|                       | HIE 280                                | Pi-alkyl         | 4.93                     |
|                       | HIE 351                                | Pi-alkyl         | 5.08                     |
|                       | PHE 159                                | Pi-alkyl         | 5.43                     |
| Compound<br><b>10</b> | ARG442                                 | Hydrogen bond    | 2.19                     |
|                       |                                        | Pi-Cation        | 4.69                     |
|                       | HIE351                                 | Hydrogen bond    | 2.14                     |
|                       | ASH215                                 | Hydrogen bond    | 2.51                     |
|                       | ASP352                                 | Pi-Anion         | 4.95                     |
| Compound<br><b>11</b> | ASH215                                 | Hydrogen bond    | 2.22                     |
|                       | ARG442                                 | Hydrogen bond    | 2.18                     |
|                       | ASP352                                 | Hydrogen bond    | 2.67; 2.73               |
|                       | GLH277                                 | Hydrogen bond    | 2.12; 2.46               |
|                       | HIE351                                 | Hydrogen bond    | 1.96                     |
